# Supplementary material for: The fate of minor alkali elements in the chemical evolution of salt lakes
Source: Springer Nature journal article supplement (doi:10.1186/1746-1448-7-2), 2011-01-01
Supplement: Additional file 3 [file 1746-1448-7-2-s3.docx]

**Additional file 3 – Supplemental data**

Reactions, products and phases added to the Pitzer database in PHREEQ.

| ***Reactions:*** | ***Products:*** | ***Phases:*** |
| --- | --- | --- |
| H4SiO4 = H4SiO4 | SrOH | Strontianite: SrCO3 |
| H4SiO4 = H3SiO4- + H+ | SrHCO3 | Witherite: BaCO3 |
| H4SiO4 = H2SiO42- + 2H+ | SrCO3 | Amorphous Silica: SiO2(a) |
| CO32- + 10H+ + 8e- = CH4 + H2O | SrSO4 | Calcedony: SiO2 |
| Ca2+ + H2O = CaOH + H+ | LiOH | Quartz: SiO2 |
| Ca2+ + CO32- + H+ = CaHCO3+ | LiSO4 | Sepiolite (d): Mg4Si6O15(OH)2·6(H2O) |
| Ca2+ + HSO4- = CaHSO4+ | SiF62- | Sepiolite: Mg4Si6O15(OH)2·6(H2O) |
| Ba2+ + H2O = BaOH- + H+ | MgF+ | BaF2 |
| Ba2+ + CO32- = BaCO3 | CaF+ | SrF2 |
| Ba2+ + HCO3- = BaHCO3+ | NaF | Barite: BaSO4 |
| Ba2+ + SO42- = BaSO4 | HF |  |
| Rb+ = Rb+ | HF2- |  |
| F- = F- | H2F2 |  |
